# Supplementary material
Source: ML conference proceedings conference paper supplement (https://proceedings.mlr.press/v48/kantchelian16.html)
Supplement: Supplementary file [file kantchelian16-supp.pdf]

---

# Appendix To Evasion and Hardening of Tree Ensemble Classifiers

---

Alex Kantchelian  
 J. D. Tygar  
 Anthony D. Joseph

AKANT@CS.BERKELEY.EDU  
 TYGAR@CS.BERKELEY.EDU  
 ADJ@CS.BERKELEY.EDU

University of California, Berkeley

## 1. Proof that the feasibility subproblem of (1) is NP-Complete

First, given an instance  $x$ , computing the sign of  $f(x)$  can be done in time at most proportional to the model size. Thus the feasibility problem is in NP. It is further NP-complete by a linear time reduction from 3-SAT as follows. We encode in  $x$  the assignment of values to the variables of the 3-SAT instance  $S$ . By convention, we choose  $x_i > 0.5$  if and only if variable  $i$  is set to true in  $S$ . Next, we construct  $f$  by arranging each clause of  $S$  as a binary regression tree. Each regression tree has exactly one internal node per level, one for each variable appearing in the clause. Each internal node holds a predicate of the form  $x_i > 0.5$  where  $i$  is a clause variable. The nodes are arranged such that there exists a unique prediction path corresponding to the falseness of the clause. For this path, the prediction value of the leaf is set to the opposite of the number of clauses in  $S$ , which is also the number of trees in the reduction. The remaining leaves predictions are set to 1. Figure 1 illustrates this construction on an example.

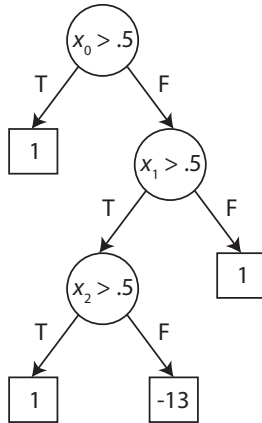

Figure 1. Regression tree for the clause  $x_0 \vee \neg x_1 \vee x_2$ . In this example,  $S$  has 13 clauses.

It is easy to see that  $S$  is satisfiable if and only if there exists  $x$  such that  $f(x) > 0$ . Indeed, a satisfying assignment for  $S$  corresponds to  $x$  such that  $f(x) = |\mathcal{T}| > 0$  and

any non-satisfying assignment for  $S$  corresponds to  $x$  such that  $f(x) \leq -1 < 0$  because there is at least one false clause which corresponds to a regression tree which output is  $-|\mathcal{T}|$ .

## 2. Objective weights

Recall that for each feature dimension  $1 \leq k \leq n$ , we have a collection of predicate variables  $(\mathbf{p}_i)_{i=1..K}$  associated with predicates  $x'_k < \tau_1, \dots, x'_k < \tau_K$  where the thresholds are sorted  $\tau_1 < \dots < \tau_K$ . Thus, the  $\mathbf{p}$  variables effectively encode the interval to which  $x'_k$  belongs to, and any feature value within the interval will lead to the same prediction  $f(x')$ . There are exactly  $K + 1$  distinct possible valuations for the binary variables  $\mathbf{p}_1 \leq \mathbf{p}_2 \leq \dots \leq \mathbf{p}_K$  and the value domain mapping  $\phi : \mathbf{p} \rightarrow (\mathbf{R} \cup \{-\infty; \infty\})^2$  is:

$$x'_k \in \phi(\mathbf{p}) = [\tau_i, \tau_{i+1})$$

$$i = \max\{k | \mathbf{p}_k = 0, 0 \leq k \leq K + 1\}$$

where by convention  $\mathbf{p}_0 = 0, \mathbf{p}_{K+1} = 1$  and  $\tau_0 = -\infty, \tau_{K+1} = \infty$ . Setting aside the  $L_\infty$  case for now, consider  $\rho \in \mathbb{N}$  the norm we are interested in for  $d$ . Instead of directly minimizing  $\|x - x'\|_\rho$ , our formulation equivalently minimizes  $\|x - x'\|_\rho^\rho$ . By minimizing the latter, we are able to consider the contributions of each feature dimension independently:

$$\|x - x'\|_\rho^\rho = \sum_{k=1}^n |x_k - x'_k|^\rho$$

We take  $0^0 = 0$  by convention. At the optimal solution,  $|x_k - x'_k|^\rho$  can only take  $K + 1$  distinct values. Indeed, if  $x'_k$  and  $x_k$  belong to the same interval, then  $x'_k = x_k$  minimizes the distance along feature  $k$ , and this distance is zero. If  $x'_k$  and  $x_k$  do not belong to same interval, then setting  $x'_k$  at the border of  $\phi(\mathbf{p})$  that is closest to  $x_k$  minimizes the distance along  $k$ . If  $\phi(\mathbf{p}) = [\tau_i, \tau_{i+1})$ , this distance is simply equal to  $\min\{|x_k - \tau_i|^\rho, |x_k - \tau_{i+1}|^\rho\}$ . Note that because of the right-open interval, the minimum distance is actually an infimum. In our implementation, we simply use

a guard value  $\epsilon = 10^{-4}$  of the same magnitude order than the numerical tolerance of the MILP solver.

Hence, we can express the minimization objective of problem (1) as a weighted sum of  $\mathbf{p}$  variables without loss of generality. Let  $0 \leq j \leq K+1$  be the indices such that  $x_k \in [\tau_j, \tau_{j+1})$ . Let  $(w_i)_{i=0..K+1}$  such that for any valid valuation of  $\mathbf{p}$  we have  $\sum_{i=0}^{K+1} w_i \mathbf{p}_i = \inf_{x'_k \in \phi(\mathbf{p})} |x_k - x'_k|^\rho$ . By the discussion above and exhaustively enumerating the  $K+1$  valuations of  $\mathbf{p}$ ,  $w$  is the solution to the following  $K+1$  equations:

$$\begin{aligned}
 w_{K+1} &= |x_k - \tau_K|^\rho \\
 w_K + w_{K+1} &= |x_k - \tau_{K-1}|^\rho \\
 &\dots \\
 w_{j+1} + \dots + w_{K+1} &= |x_k - \tau_{j+1}|^\rho \\
 w_j + w_{j+1} + \dots + w_{K+1} &= 0 \\
 w_{j-1} + w_j + w_{j+1} + \dots + w_{K+1} &= |x_k - \tau_j - \epsilon|^\rho \\
 &\dots \\
 w_1 + w_2 + w_3 + \dots + w_{K+1} &= |x_k - \tau_2 - \epsilon|^\rho \\
 w_0 + w_1 + w_2 + w_3 + \dots + w_{K+1} &= |x_k - \tau_1 - \epsilon|^\rho
 \end{aligned}$$

Note that this system of linear equations is already in triangular form and obtaining the  $w$  values is immediate. To obtain the full MILP objective, we repeat this process for every feature  $1 \leq k \leq n$  and take the sum of all weighted sums of subsets of  $\mathbf{p}$ .

Finally, for the  $L_\infty$  case, we use 1 continuous variable  $\mathbf{b}$ . We introduce  $n$  additional constraints to the formulation, one for each feature dimension  $k$ . As per the previous discussion, we can generate the weights  $w$  such that  $\sum_{i=0}^{K+1} w_i \mathbf{p}_i = \inf_{x'_k \in \phi(\mathbf{p})} |x_k - x'_k|$  (this is the  $\rho = 1$  case). The additional constraint on dimension  $k$  is then:

$$\sum_{i=0}^{K+1} w_i \mathbf{p}_i \leq \mathbf{b}$$

and the MILP objective is simply the variable  $\mathbf{b}$  itself.
